# Supplementary material for: Local Recurrence of Rectal Cancer After Transanal Total Mesorectal Excision and Risk Factors: A Nationwide Multicenter Cohort Study in Japan
Source: PubMed Central journal article supplement — Ann Surg Open. 2024 Jan 8;5(1):e369. doi: 10.1097/AS9.0000000000000369 (PMC11175902; doi:10.1097/as9.0000000000000369), 2024-01-08
Supplement: as9-5-e369-s001.pdf [file as9-5-e369-s001.pdf]

**Supplementary Table 1. Univariable and multivariable analysis of potential risk factors for local recurrence**

|                          | Univariate            |         | Multivariate          |         |
|--------------------------|-----------------------|---------|-----------------------|---------|
| Variable                 | Hazard ratio (95% CI) | p-value | Hazard ratio (95% CI) | p-value |
| Sex                      |                       |         |                       |         |
| Male                     | Reference             |         |                       |         |
| Female                   | 0.76 (0.41-1.42)      | 0.38    |                       |         |
| BMI                      |                       |         |                       |         |
| Normal                   | Reference             |         |                       |         |
| Underweight              | 1.50 (0.68-3.30)      | 0.31    |                       |         |
| Overweight               | 0.75 (0.36-1.55)      | 0.43    |                       |         |
| Obese                    | 2.23 (0.85-5.85)      | 0.10    |                       |         |
| Neoadjuvant therapy      |                       |         |                       |         |
| No                       | Reference             |         |                       |         |
| Yes                      | 0.76 (0.44-1.33)      | 0.33    |                       |         |
| Distance from AV (cm)    | 0.86 (0.76-0.98)      | 0.03    | 0.77 (0.65-0.91)      | 0.003   |
| Tumor location           |                       |         |                       |         |
| Anterior/circumferential | Reference             |         |                       |         |
| Not anterior             | 1.22 (0.71-2.08)      | 0.46    |                       |         |
| ypT*                     |                       |         |                       |         |
| 0-3                      | Reference             |         | Reference             |         |
| 4a, 4b                   | 2.98 (1.38-6.41)      | 0.006   | 2.34 (1.03-5.34)      | 0.04    |

|                                     |                   |        |                   |      |
|-------------------------------------|-------------------|--------|-------------------|------|
| ypStage*                            |                   |        |                   |      |
| 0-II                                | Reference         |        | Reference         |      |
| III, IV                             | 2.64 (1.54-4.52)  | <0.001 | 2.14 (1.18-)      | 0.01 |
| CEA                                 | 1.00 (1.00-1.01)  | 0.42   |                   |      |
| Adjuvant chemotherapy               |                   |        |                   |      |
| No                                  | Reference         |        |                   |      |
| Yes                                 | 1.59 (0.93-2.72)  | 0.09   |                   |      |
| Operative procedure                 |                   |        |                   |      |
| Low anterior resection              | Reference         |        | Reference         |      |
| Intersphincteric resection          | 1.00 (0.51-1.97)  | 1.00   | 0.88 (0.38-2.00)  | 0.75 |
| Abdominoperineal resection          | 0.98 (0.45-2.16)  | 0.97   | 0.27 (0.09-0.85)  | 0.03 |
| Hartmann                            | 1.22 (0.26-5.61)  | 0.80   | 1.46 (0.37-5.70)  | 0.58 |
| Other                               | 3.73 (0.46-30.00) | 0.21   | 2.56 (0.30-21.92) | 0.38 |
| Purse-string suture                 |                   |        |                   |      |
| Single                              | Reference         |        |                   |      |
| Double or more                      | 1.41 (0.70-2.85)  | 0.33   |                   |      |
| Intraoperative TaTME adverse events |                   |        |                   |      |
| No                                  | Reference         |        |                   |      |
| Yes                                 | 1.63 (0.68-3.87)  | 0.27   |                   |      |
| Purse-string failure                |                   |        |                   |      |
| No                                  | Reference         |        |                   |      |

|                                               |                   |        |                  |       |
|-----------------------------------------------|-------------------|--------|------------------|-------|
| Yes                                           | 2.41 (0.73-7.93)  | 0.14   |                  |       |
| Visceral injury                               |                   |        |                  |       |
| No                                            | Reference         |        |                  |       |
| Yes                                           | 2.15 (0.65-7.09)  | 0.20   |                  |       |
| Perineural invasion                           |                   |        |                  |       |
| Negative                                      | Reference         |        | Reference        |       |
| Positive                                      | 3.32 (1.88-5.87)  | <0.001 | 2.61 (1.38-4.95) | 0.004 |
| Resection status                              |                   |        |                  |       |
| R0                                            | Reference         |        | Reference        |       |
| R1                                            | 5.05 (2.55-10.00) | <0.001 | 3.51 (1.57-7.83) | 0.003 |
| Number of procedures performed by the surgeon | 1.00 (0.99-1.01)  | 0.78   |                  |       |
| Annual hospital volume                        | 1.00 (0.97-1.02)  | 0.88   |                  |       |

\*Tumors were classified according to the American Joint Committee on Cancer TNM system. *AV* anal verge, *BMI* body mass index, *CI* confidence interval, *TaTME* transanal total mesorectal excision
